# Supplementary material for: Discovery of novel and potent tacrine derivatives as CDK2 inhibitors
Source: Royal Society of Chemistry journal article supplement (doi:10.1039/d2nj03591j), 2022-01-01
Supplement: d2nj03591j1.pdf [file d2nj03591j1.pdf]

## SUPPORTING INFORMATION

### Discovery of Novel and Potent Tacrine Derivatives as CDK2 Inhibitors

#### Discovery of Novel and Potent Tacrine Derivatives as CDK2 Inhibitors

Yaoguang Huang <sup>a</sup>, Deping Li <sup>c</sup>, Chang Xu <sup>d</sup>, Chengze Zhu <sup>d</sup>, Limeng Wu <sup>a</sup>, Shen Meiling <sup>f</sup>, Li Yue <sup>e</sup>, Xiaowen Jiang <sup>a</sup>, Xin Liu <sup>d</sup>, Wenwu Liu <sup>b\*</sup>, and Qingchun Zhao <sup>b\*</sup>

<sup>a</sup> School of Traditional Chinese Materia Medica, Shenyang Pharmaceutical University, Shenyang 110016, People's Republic of China

<sup>b</sup> Department of Pharmacy, General Hospital of Northern Theater Command, Shenyang 110840, People's Republic of China

<sup>c</sup> Department of Pharmacy, First Affiliated Hospital of Gannan Medical University, Ganzhou 341000, People's Republic of China

<sup>d</sup> School of Life Sciences, Shenyang Pharmaceutical University, Shenyang 110016, People's Republic of China

<sup>e</sup> School of Chemical Engineering, Sichuan University of Science & Engineering, 180 Xueyuan Street, Huixing Road, Zigong, Sichuan, 643000, China

<sup>f</sup> School of Life Sciences, Yunnan University, Kunming 650091, China

E-mail address: [zhaoqingchun1967@163.com](mailto:zhaoqingchun1967@163.com) (Q.C. Zhao), [sunny961010@163.com](mailto:sunny961010@163.com) (W.W. Liu)

<sup>1</sup>H NMR Spectra and <sup>13</sup>C NMR Spectra of Representative Compounds.

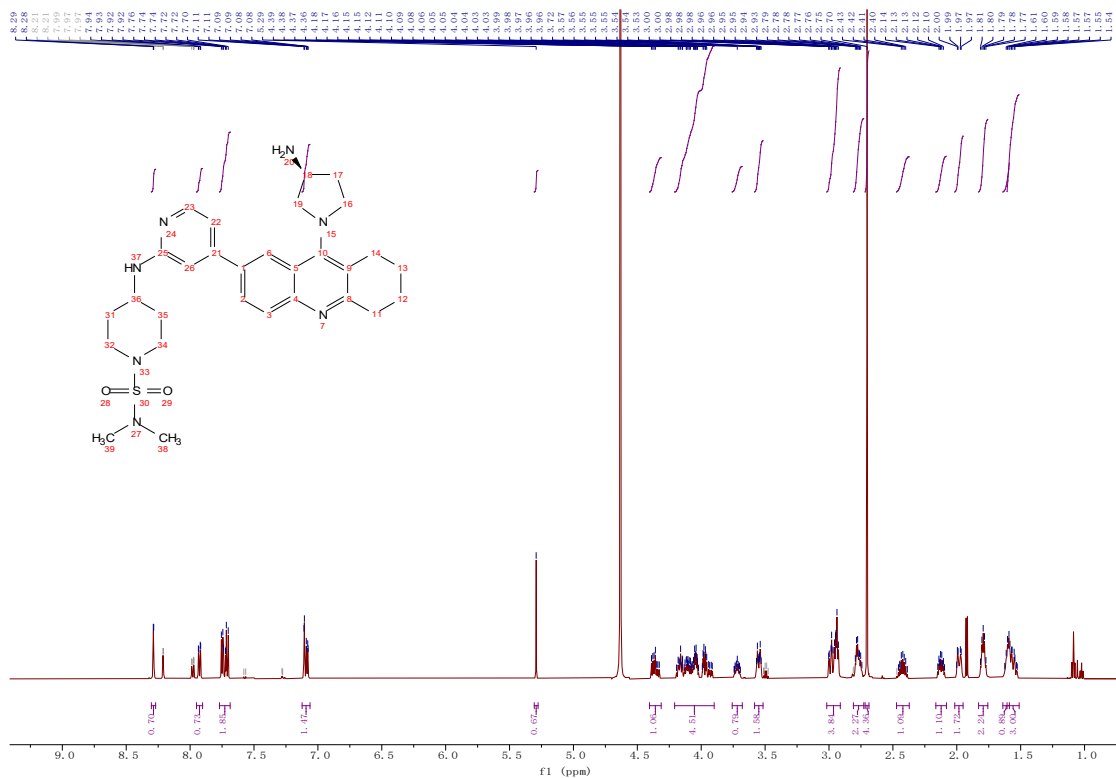

<sup>1</sup>H NMR spectrum of ZLHT-3 in Deuterium Oxide.

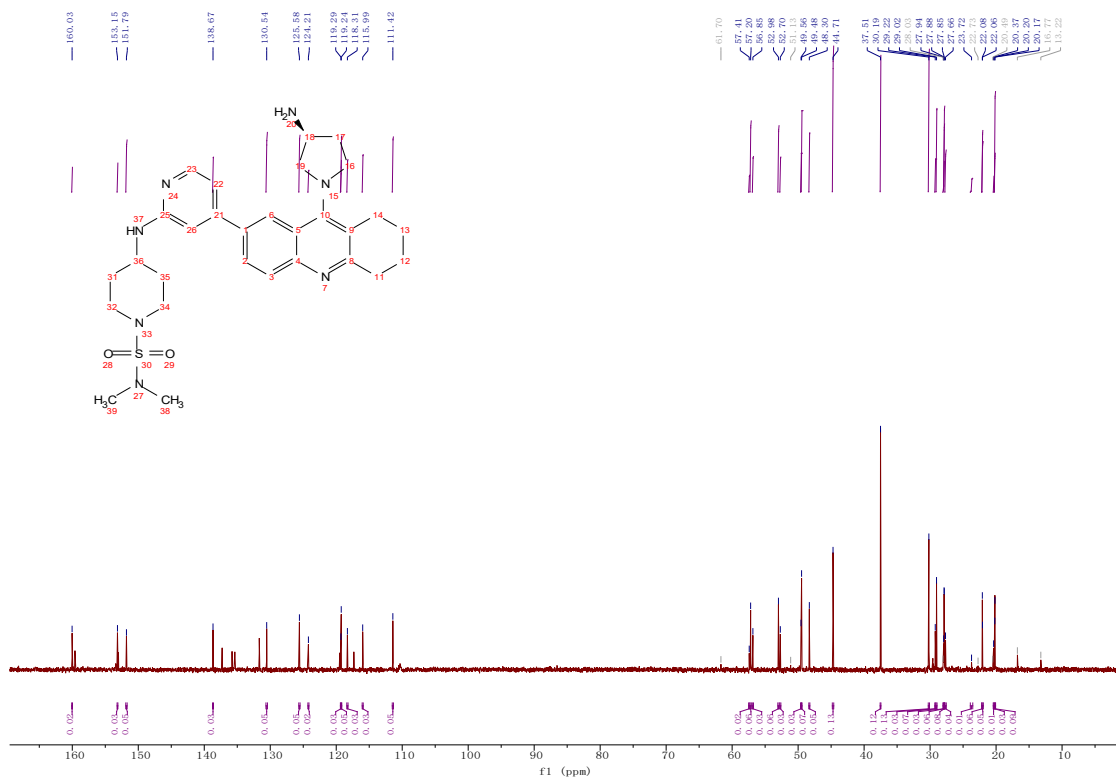

<sup>13</sup>C NMR spectrum of ZLHT-3 in Deuterium Oxide.





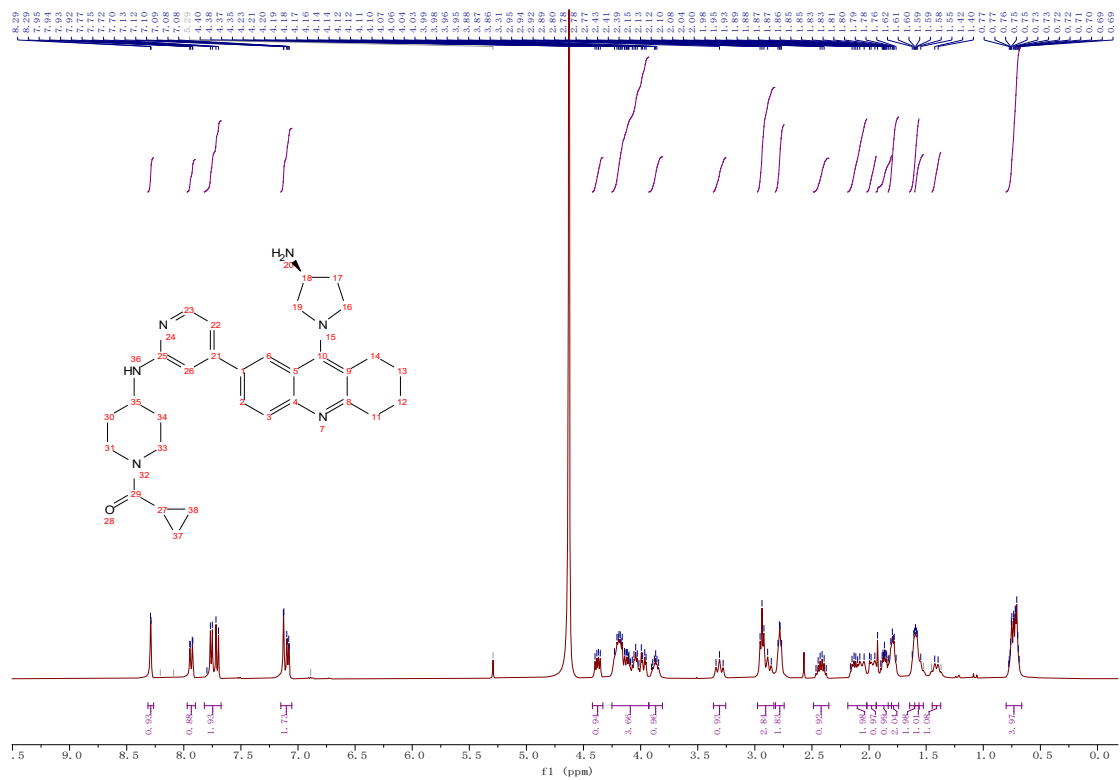

**<sup>1</sup>H NMR spectrum of ZLHT-6 in Deuterium Oxide.**

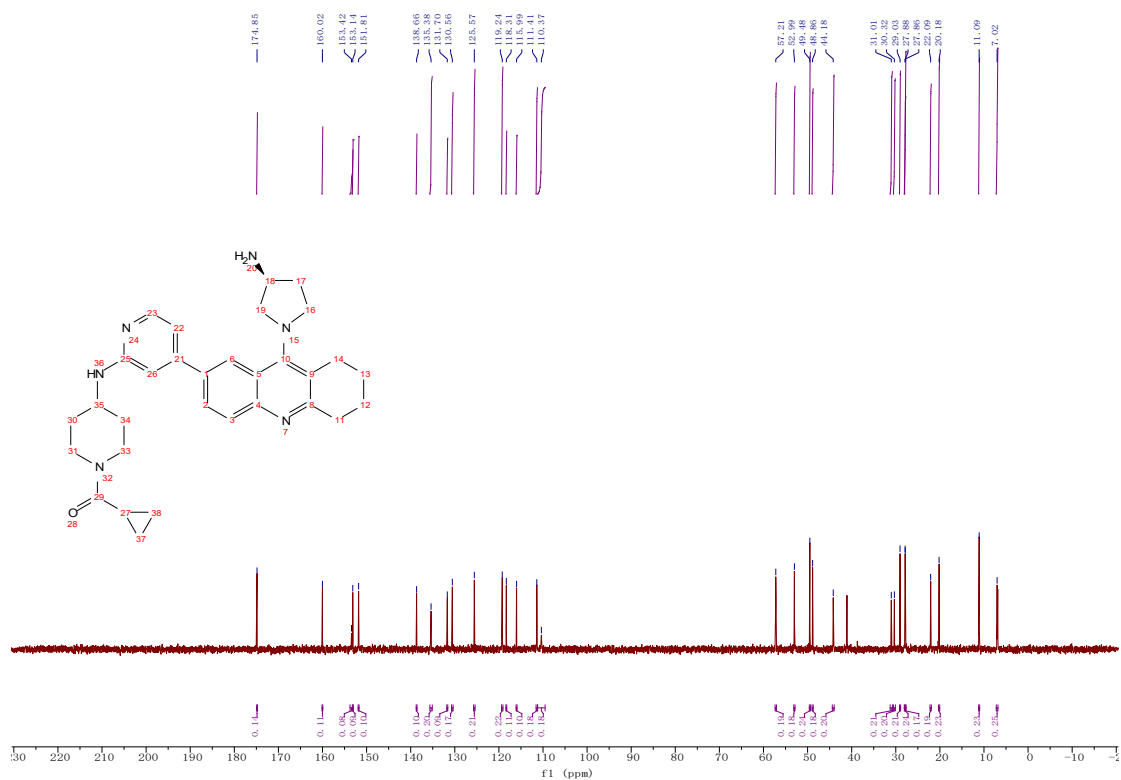

**<sup>13</sup>C NMR spectrum of ZLHT-6 in Deuterium Oxide.**



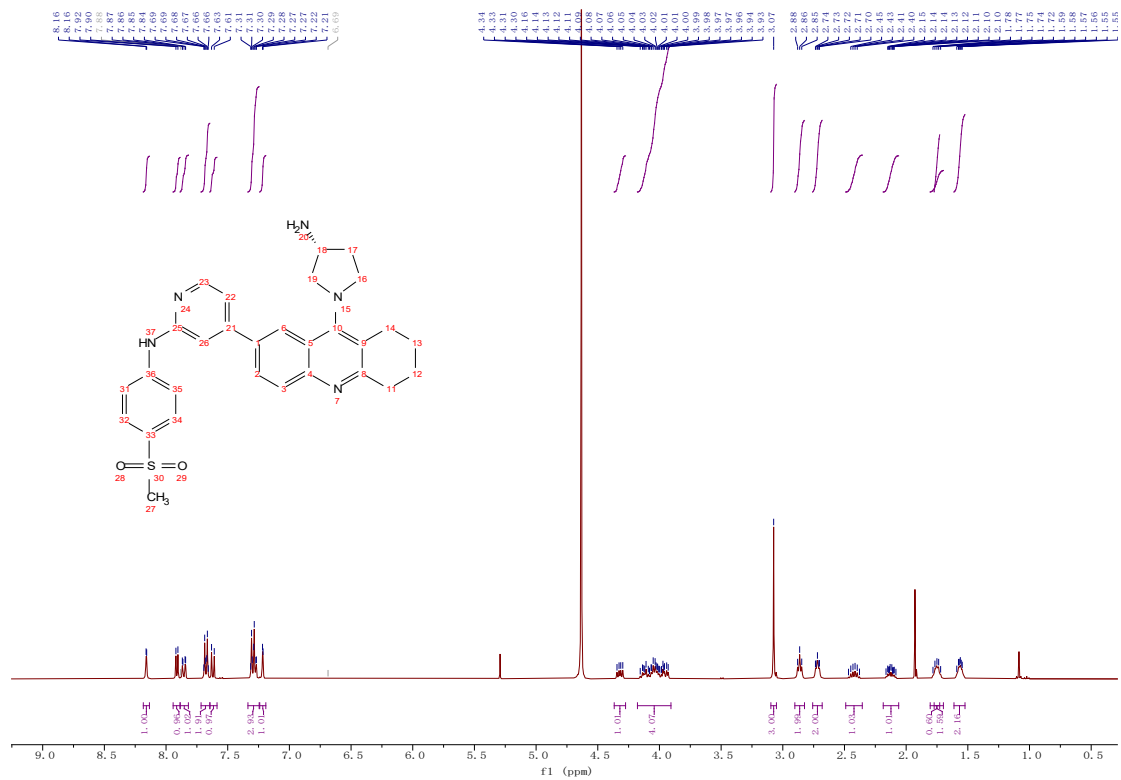

**<sup>1</sup>H NMR spectrum of ZLHT-8 in Deuterium Oxide.**

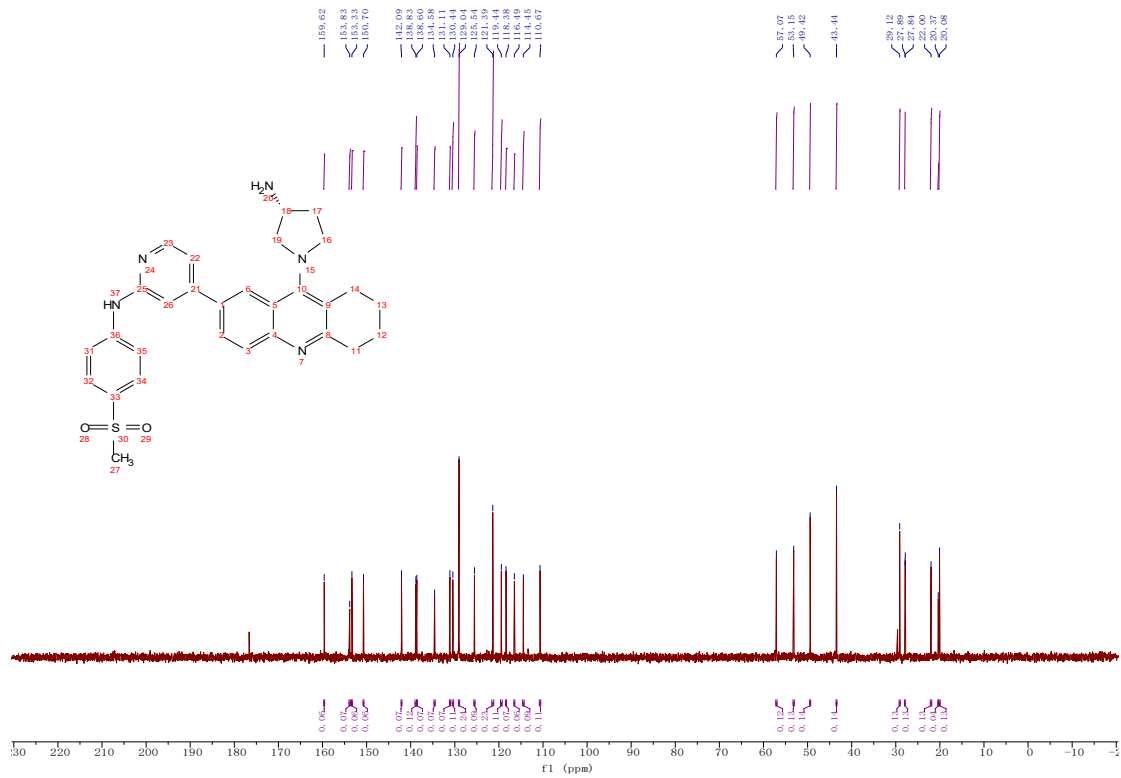

**<sup>13</sup>C NMR spectrum of ZLHT-8 in Deuterium Oxide.**

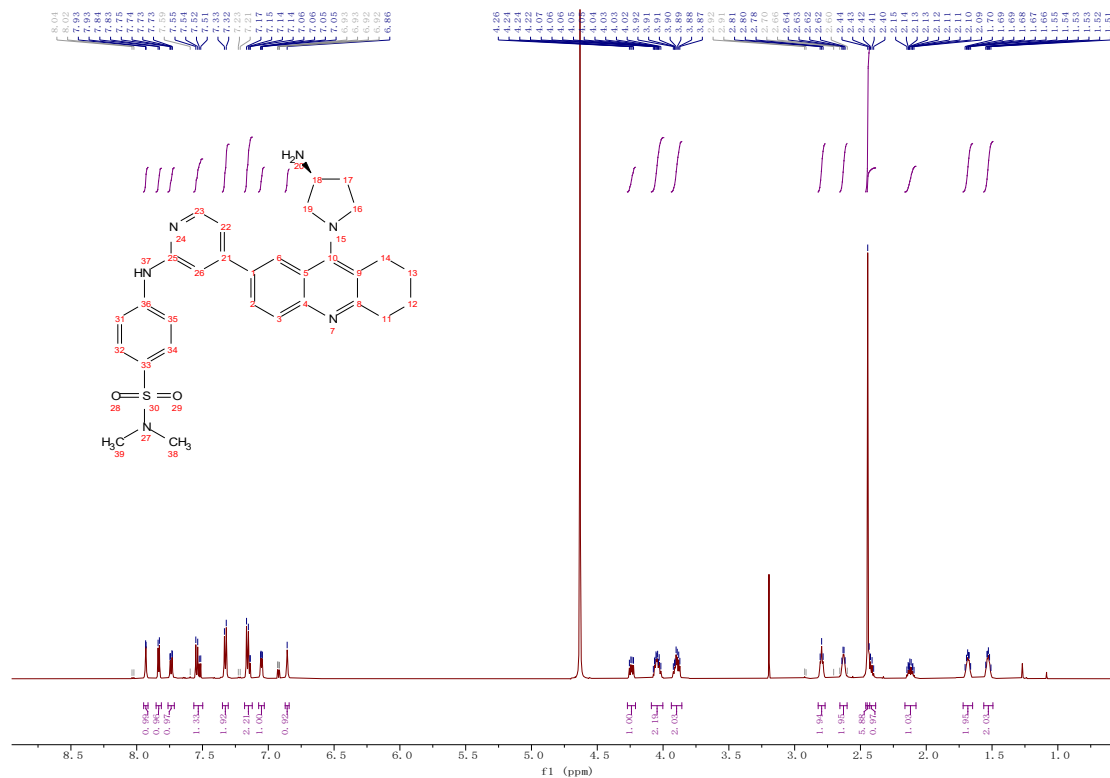

**<sup>1</sup>H NMR spectrum of ZLHT-9 in Deuterium Oxide.**

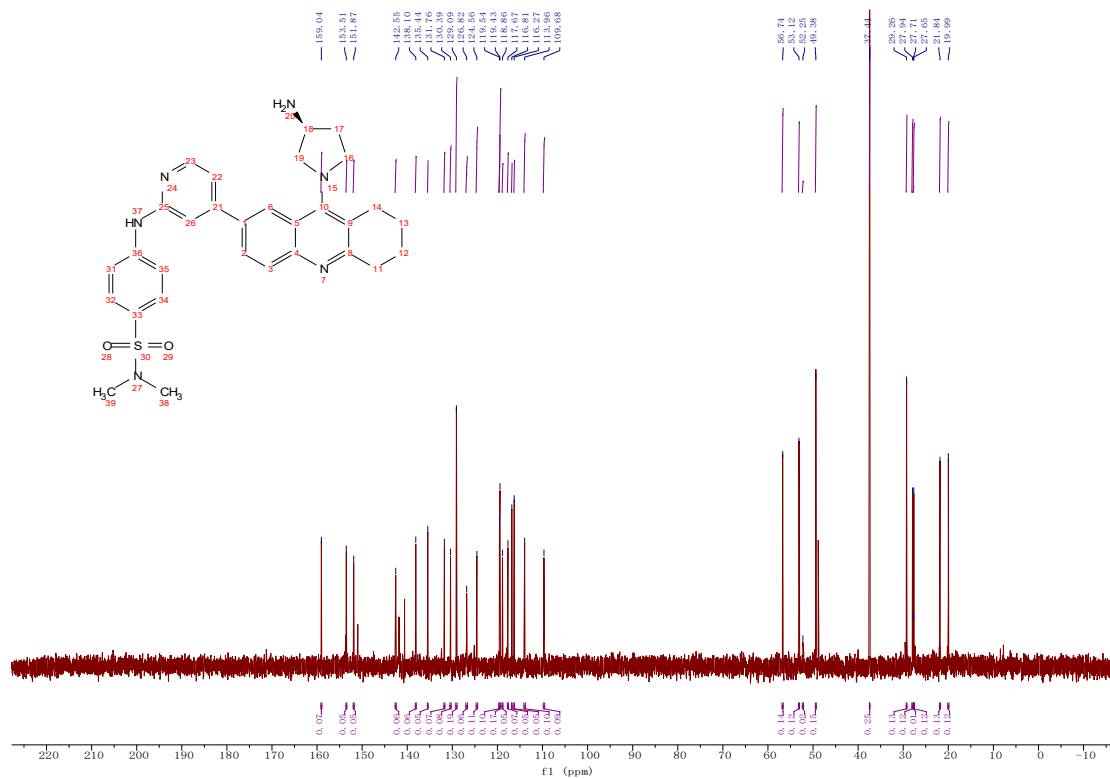

**<sup>13</sup>C NMR spectrum of ZLHT-9 in Deuterium Oxide.**



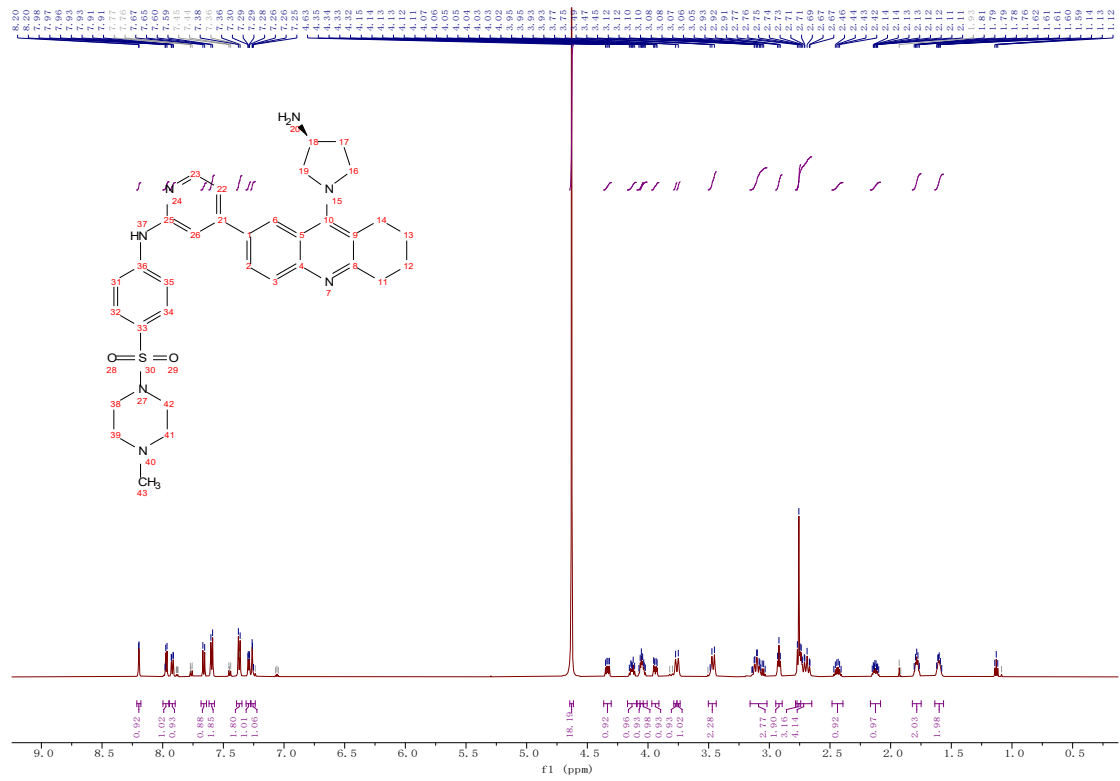

<sup>1</sup>H NMR spectrum of ZLHT-10 in Deuterium Oxide.

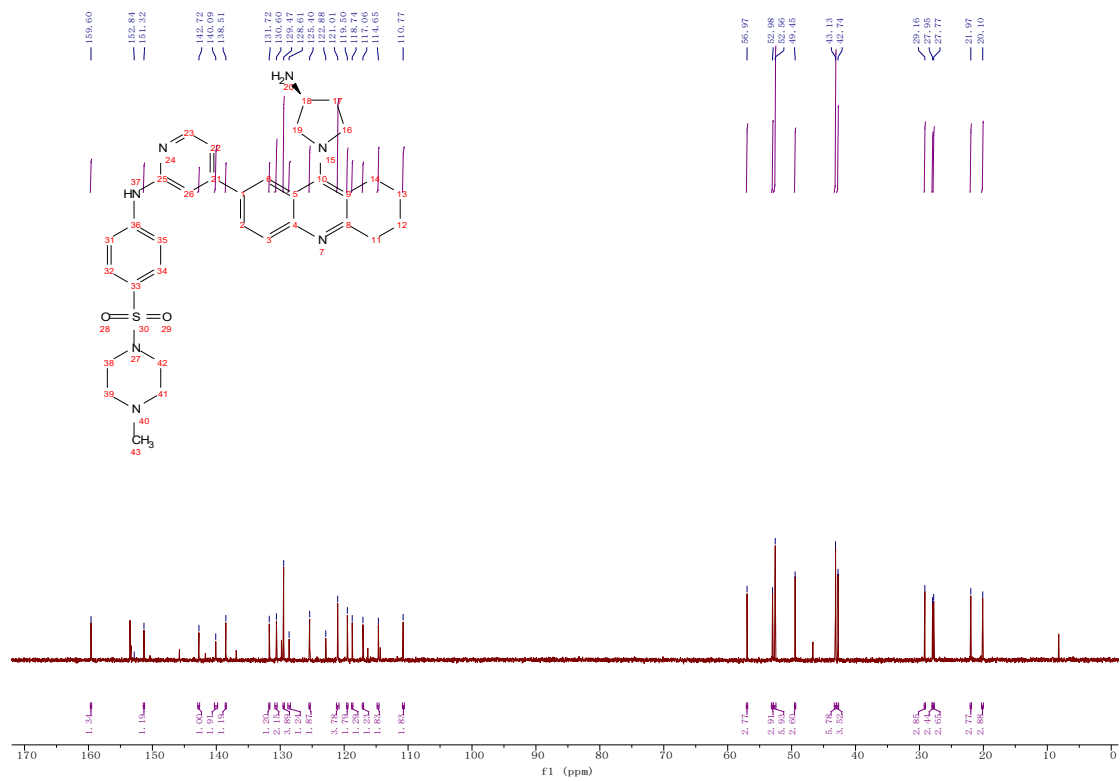

<sup>13</sup>C NMR spectrum of ZLHT-10 in Deuterium Oxide.

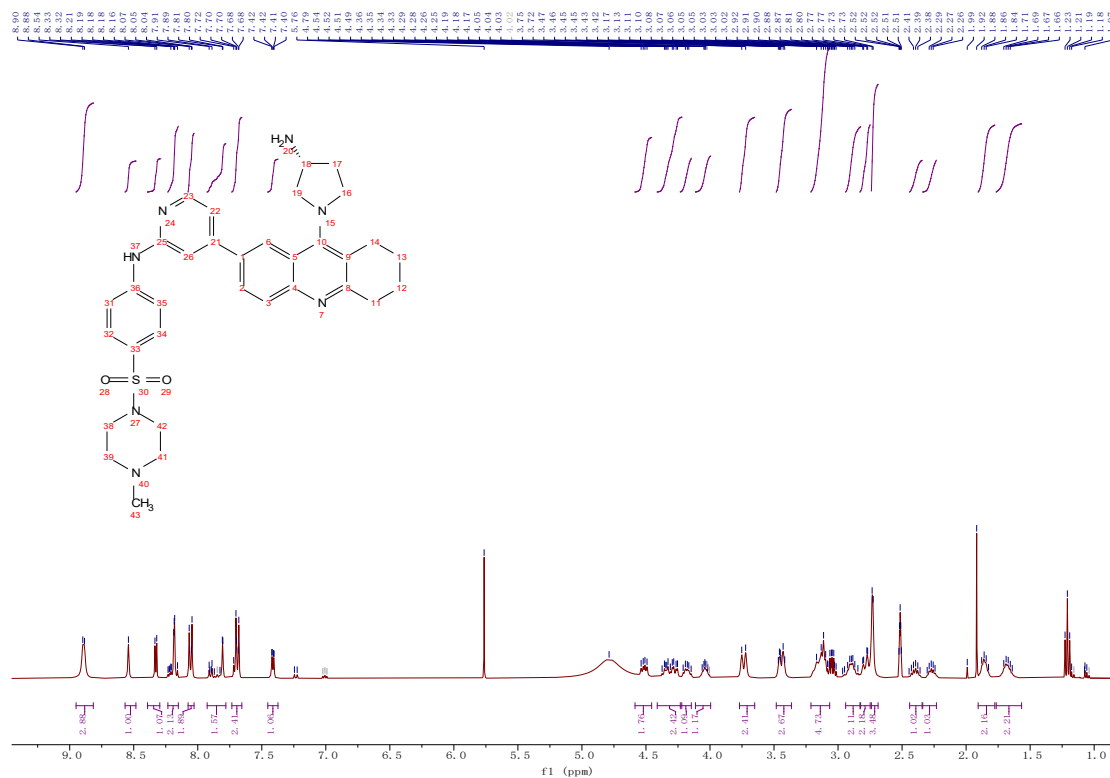

<sup>1</sup>H NMR spectrum of ZLHT-11 in DMSO-d<sub>6</sub>.

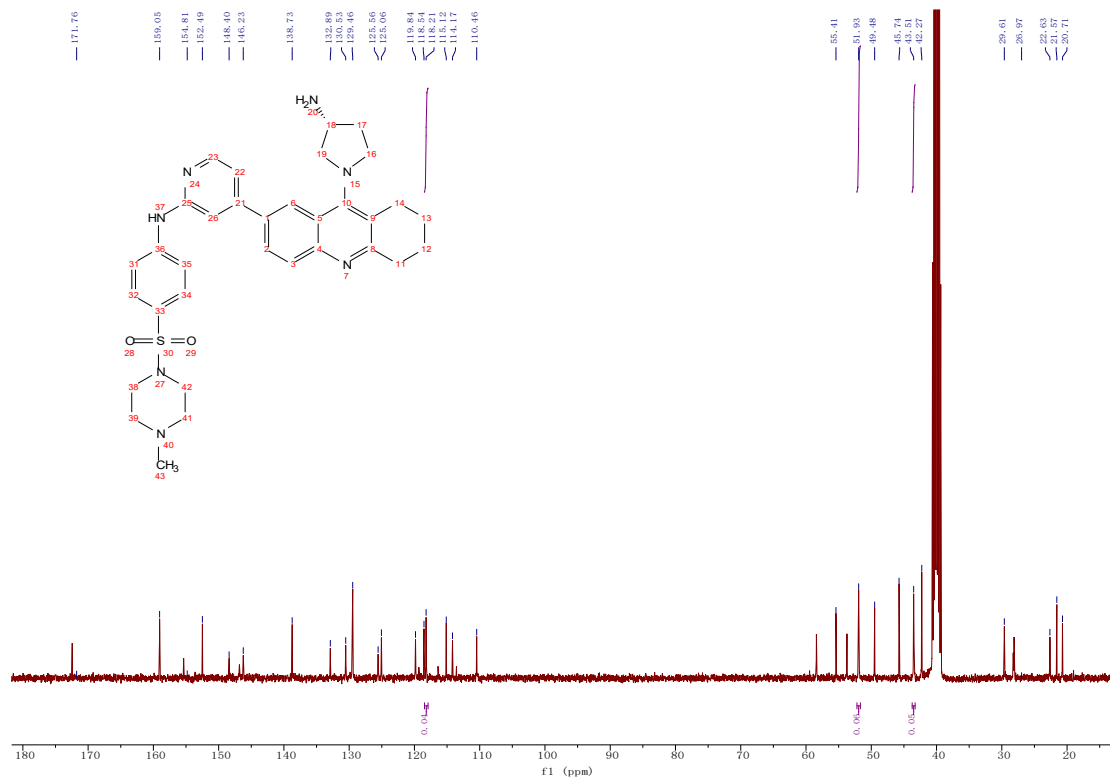

<sup>13</sup>C NMR spectrum of ZLHT-11 in DMSO-d<sub>6</sub>.

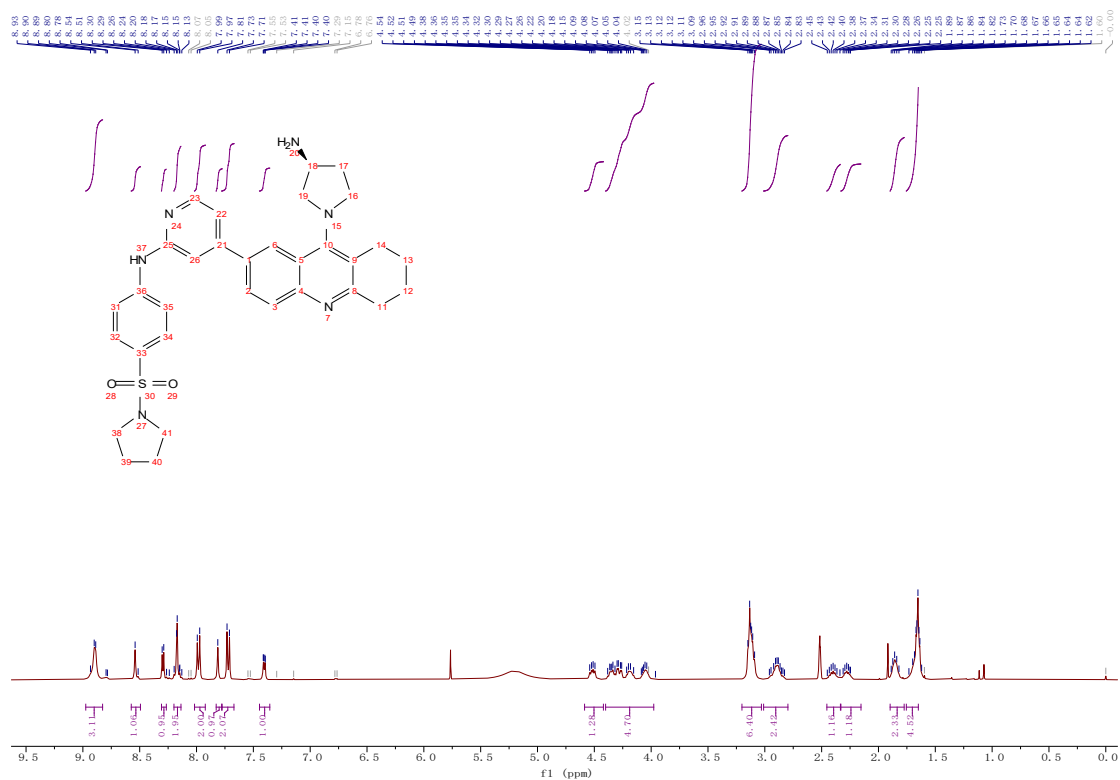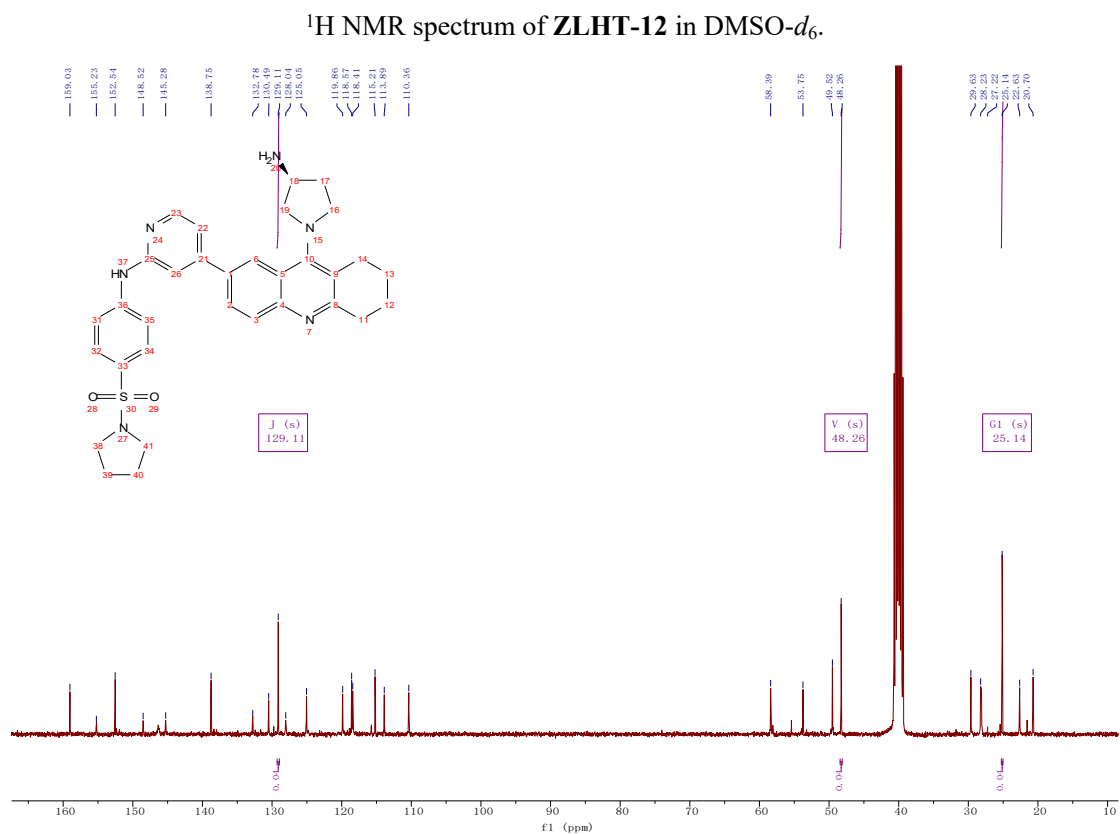

**<sup>13</sup>C NMR spectrum of ZLHT-12 in DMSO-*d*<sub>6</sub>.**

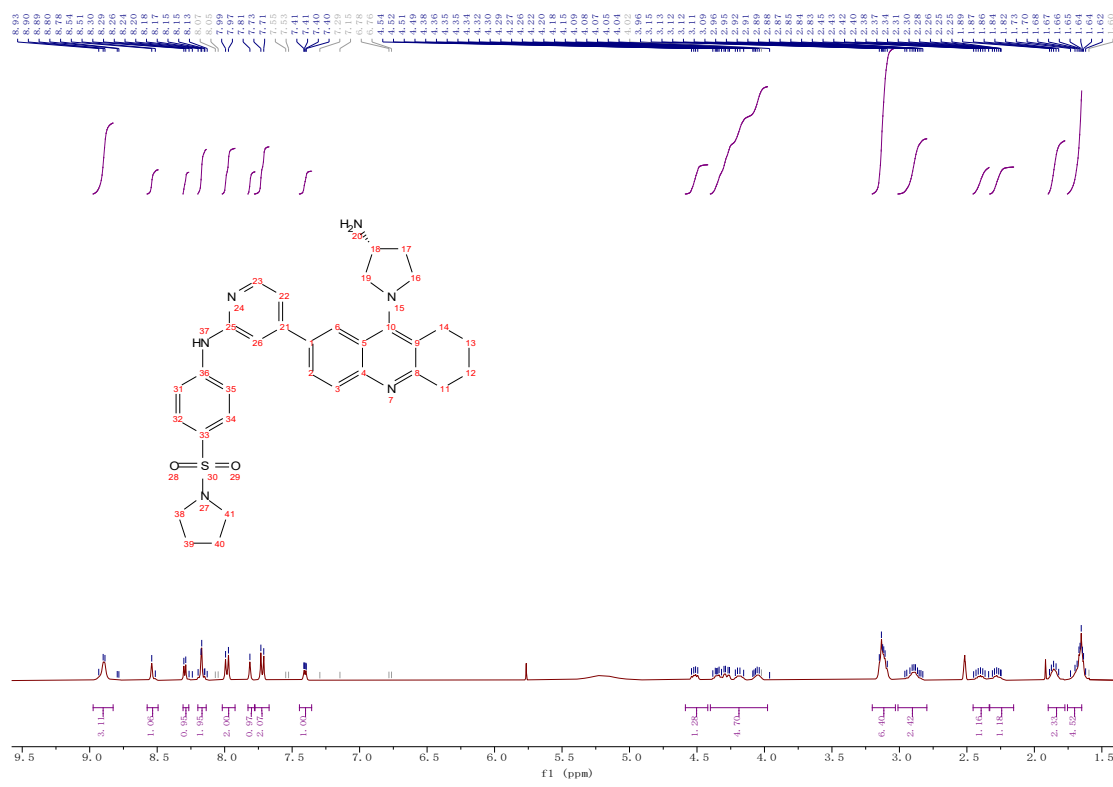

<sup>1</sup>H NMR spectrum of ZLHT-13 in DMSO-d<sub>6</sub>.

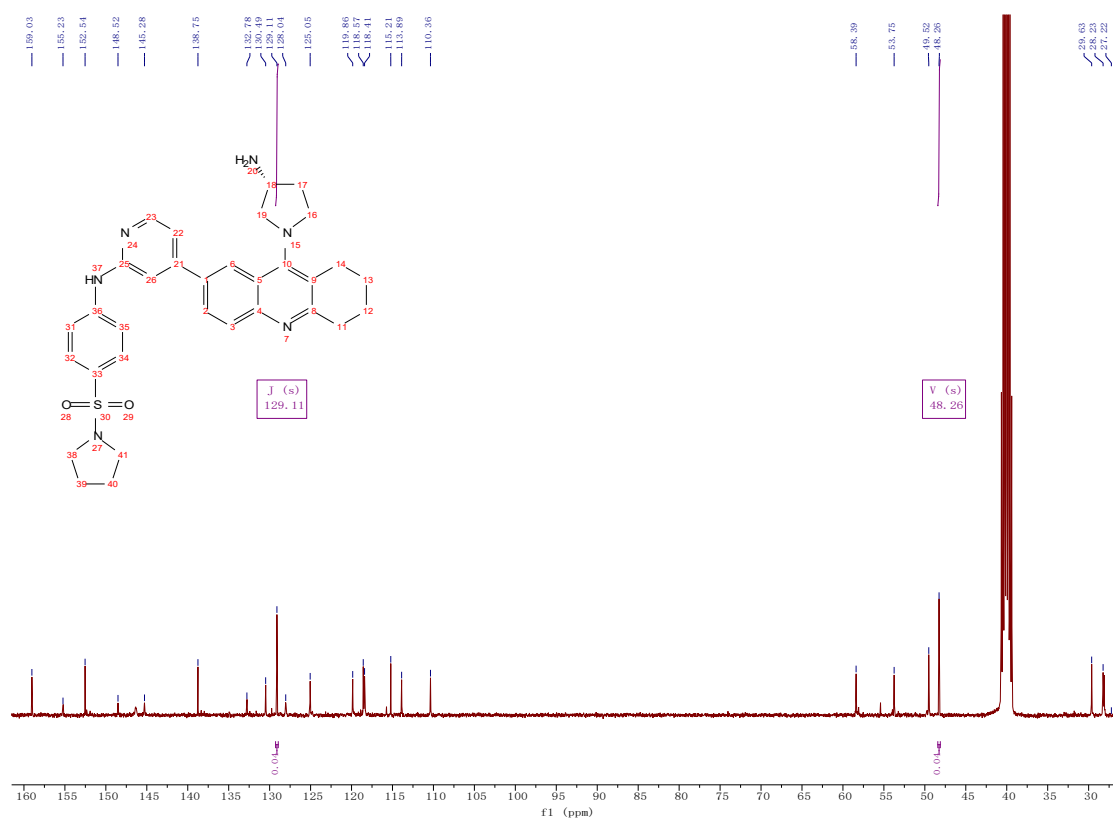

<sup>13</sup>C NMR spectrum of ZLHT-13 in DMSO-d<sub>6</sub>.

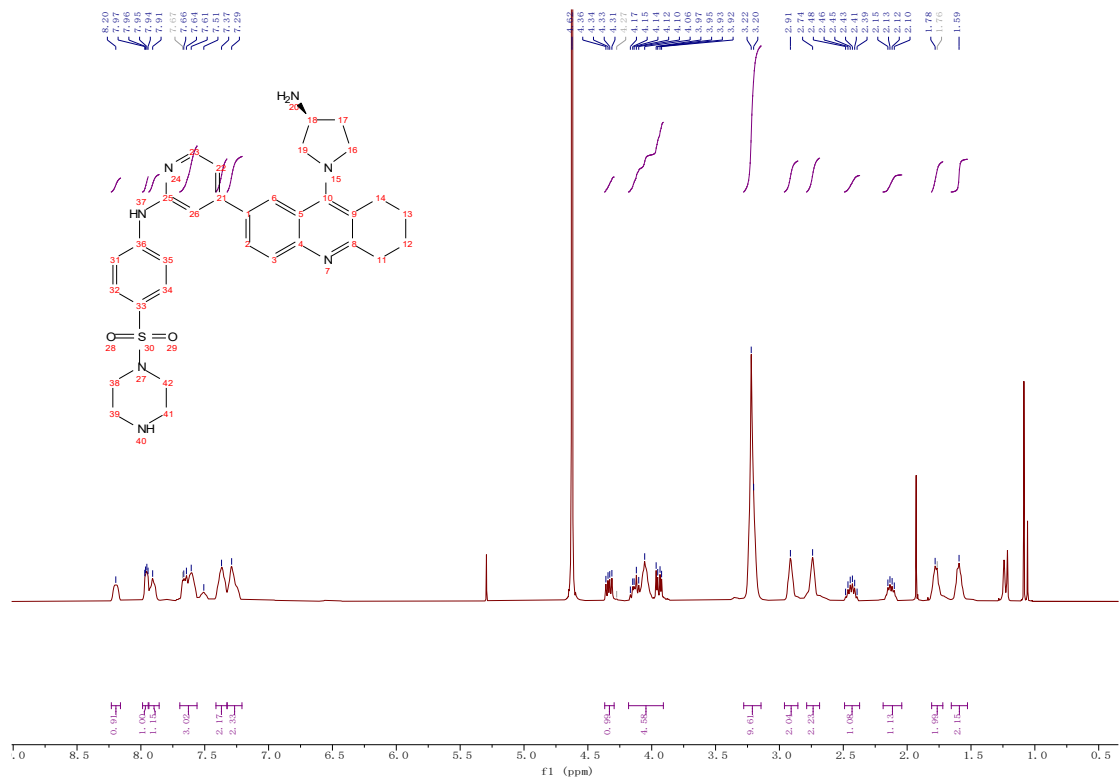

**<sup>1</sup>H NMR spectrum of ZLHT-14 in Deuterium Oxide.**

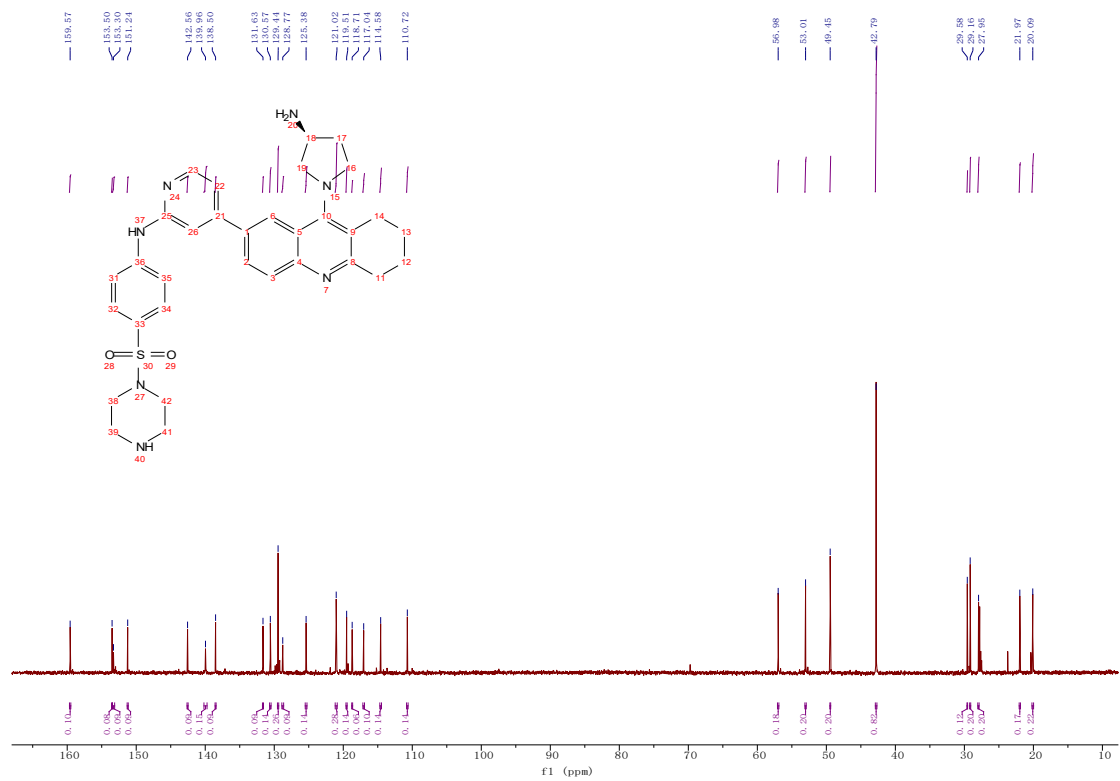

**<sup>13</sup>C NMR spectrum of ZLHT-14 in Deuterium Oxide.**

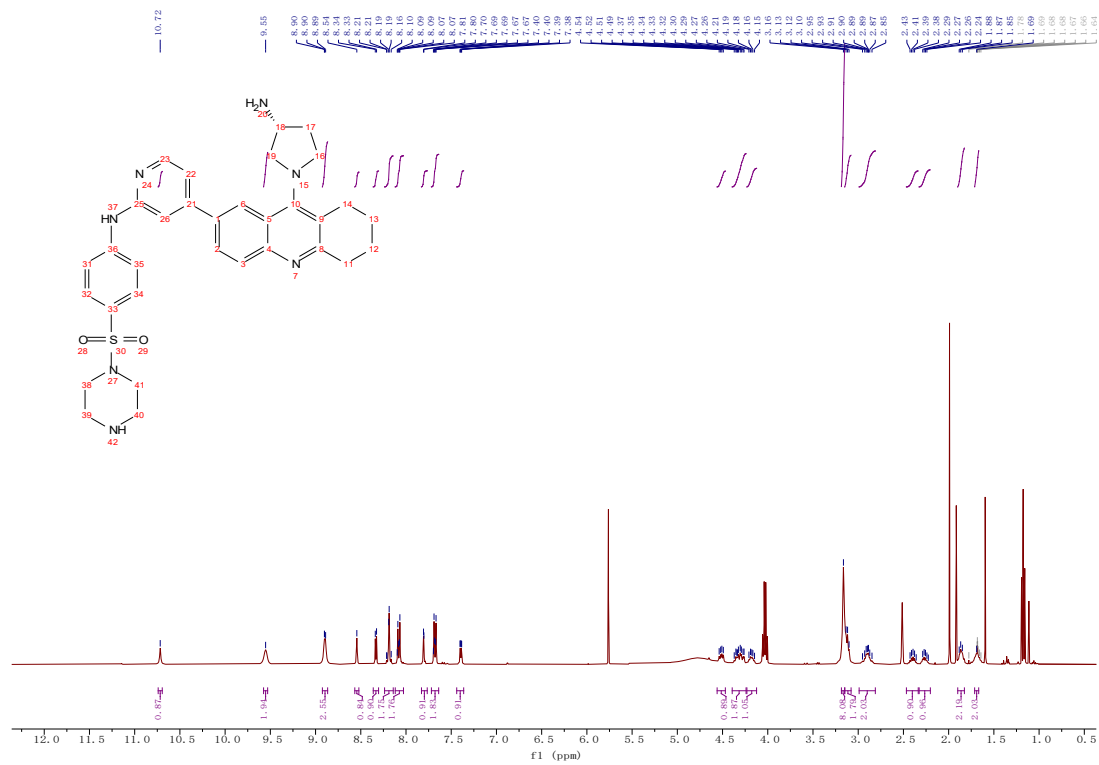

<sup>1</sup>H NMR spectrum of ZLHT-15 in DMSO-*d*<sub>6</sub>.

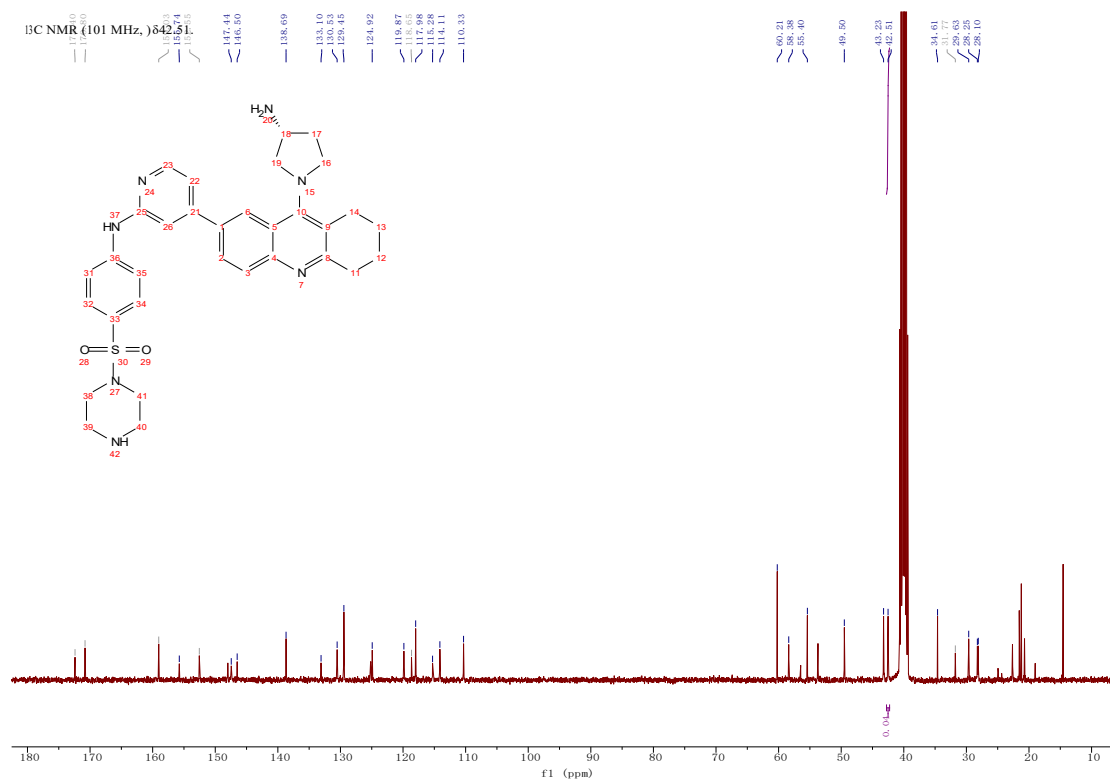

<sup>13</sup>C NMR spectrum of ZLHT-15 in DMSO-*d*<sub>6</sub>.

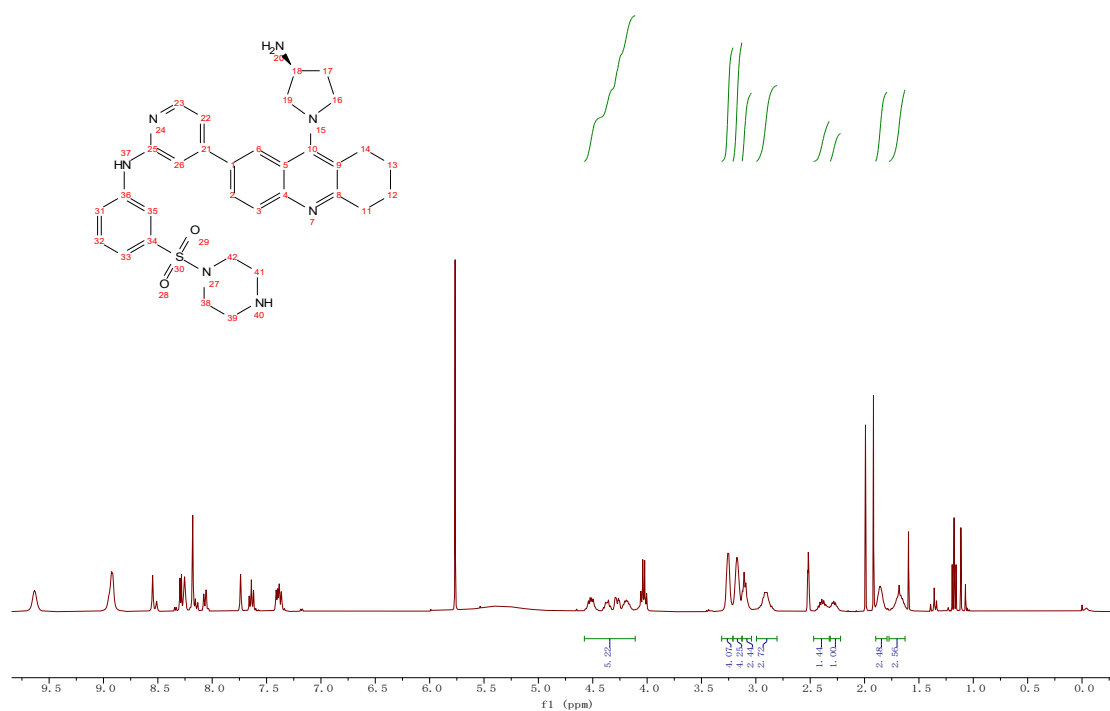

<sup>1</sup>H NMR spectrum of ZLHT-16 in Deuterium DMSO-*d*<sub>6</sub>.

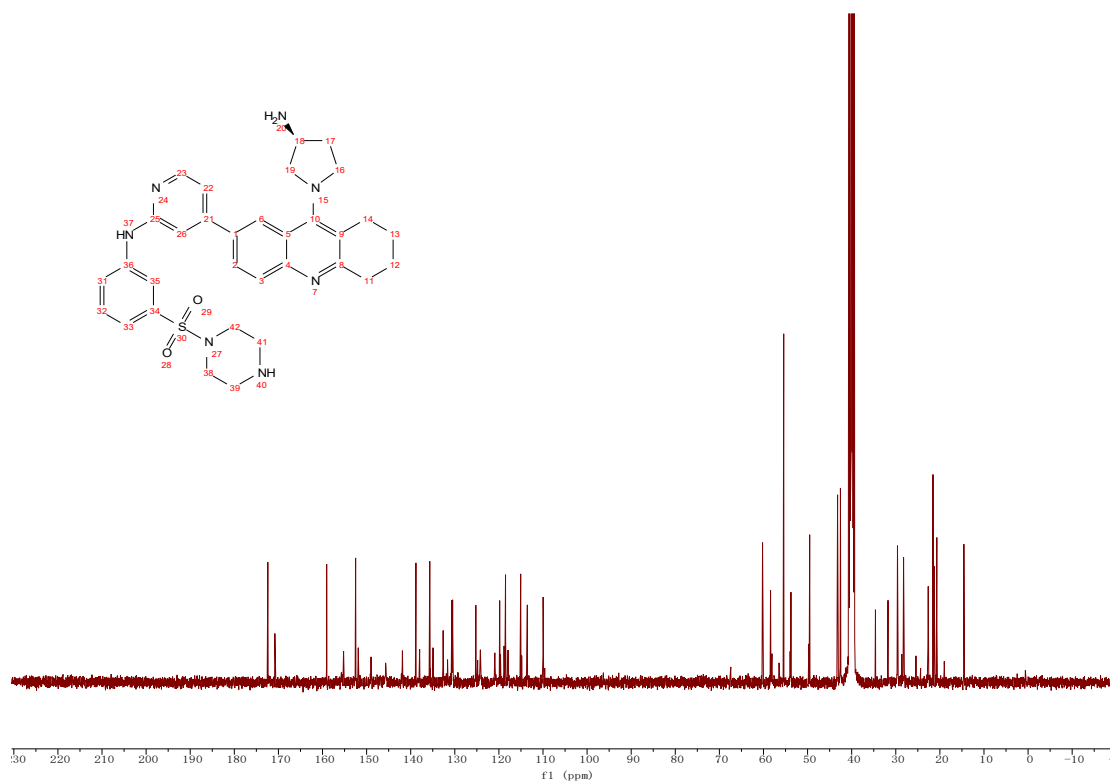

<sup>13</sup>C NMR spectrum of ZLHT-16 in DMSO-*d*<sub>6</sub>.

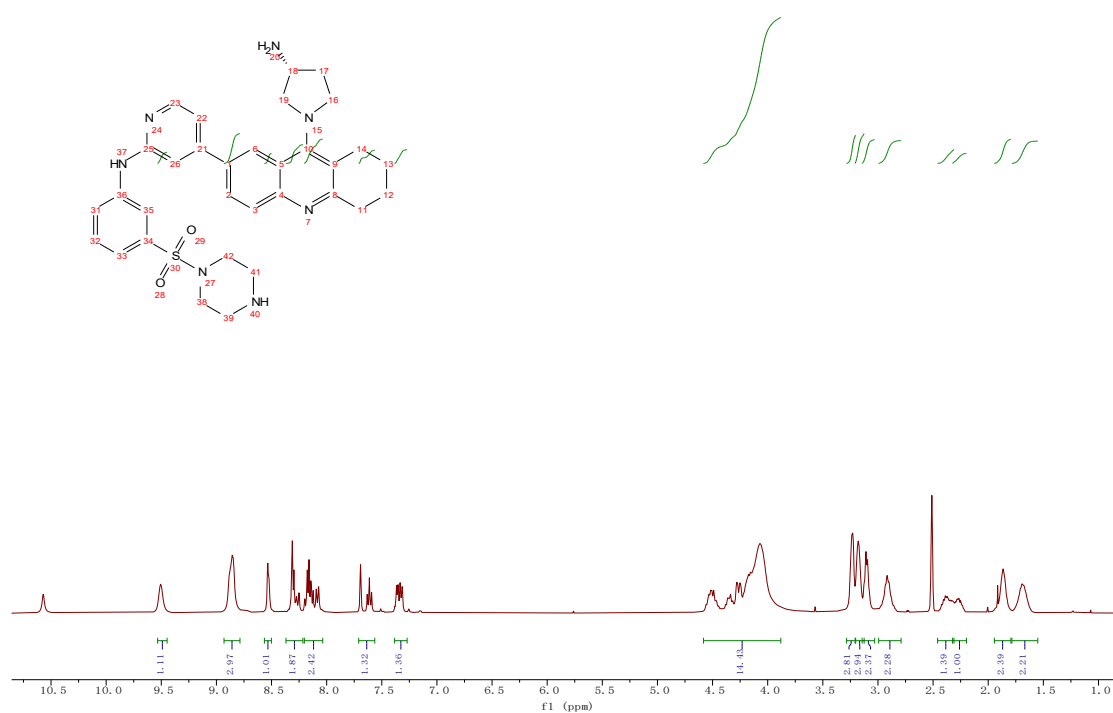

<sup>1</sup>H NMR spectrum of ZLHT-17 in DMSO-*d*<sub>6</sub>.

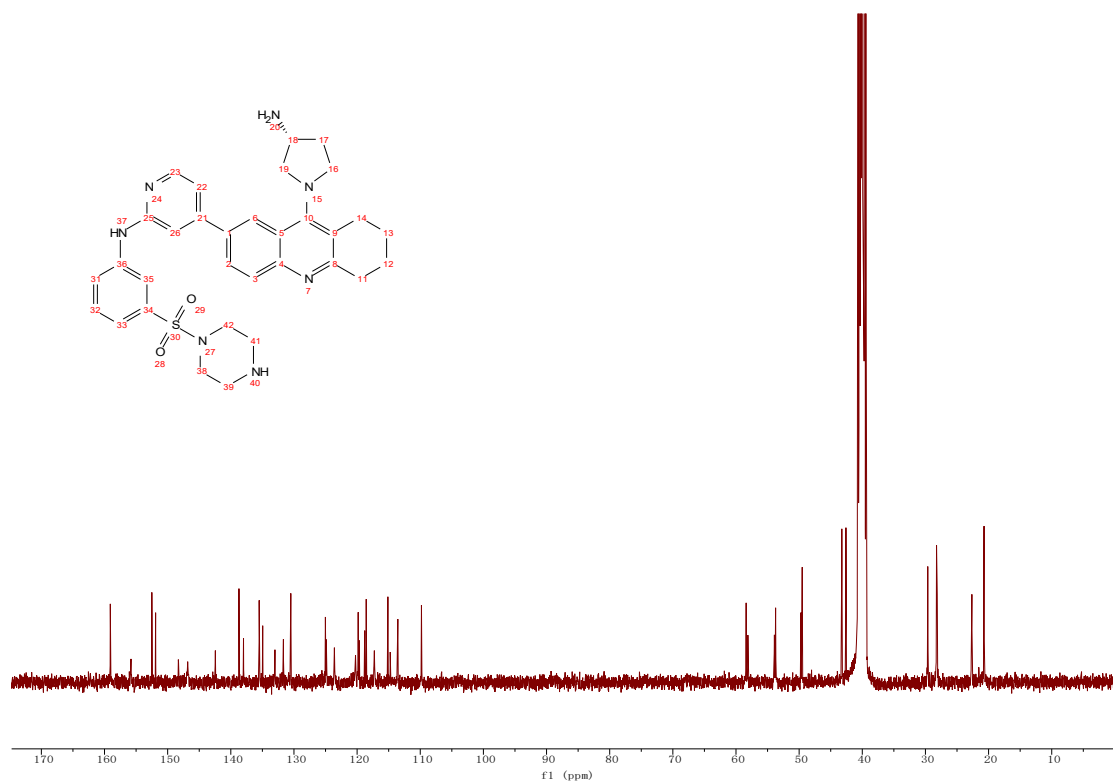

<sup>13</sup>C NMR spectrum of ZLHT-17 in DMSO-*d*<sub>6</sub>.





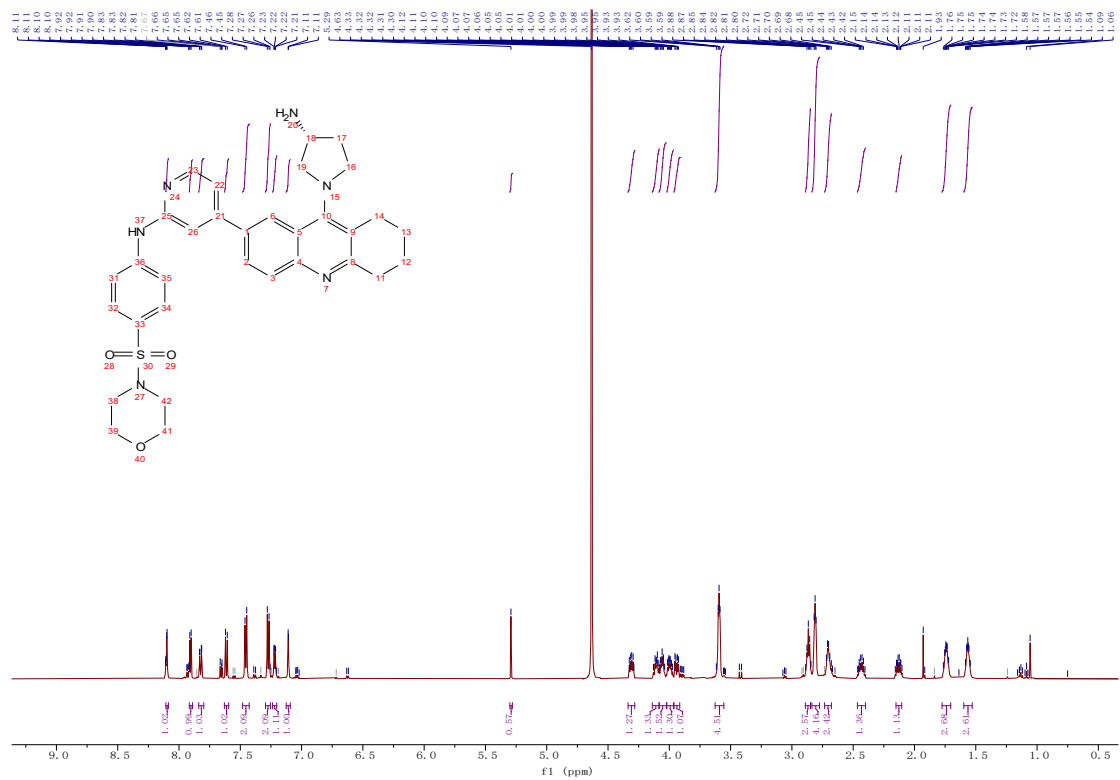

**<sup>1</sup>H NMR spectrum of ZLHT-19 in Deuterium Oxide.**

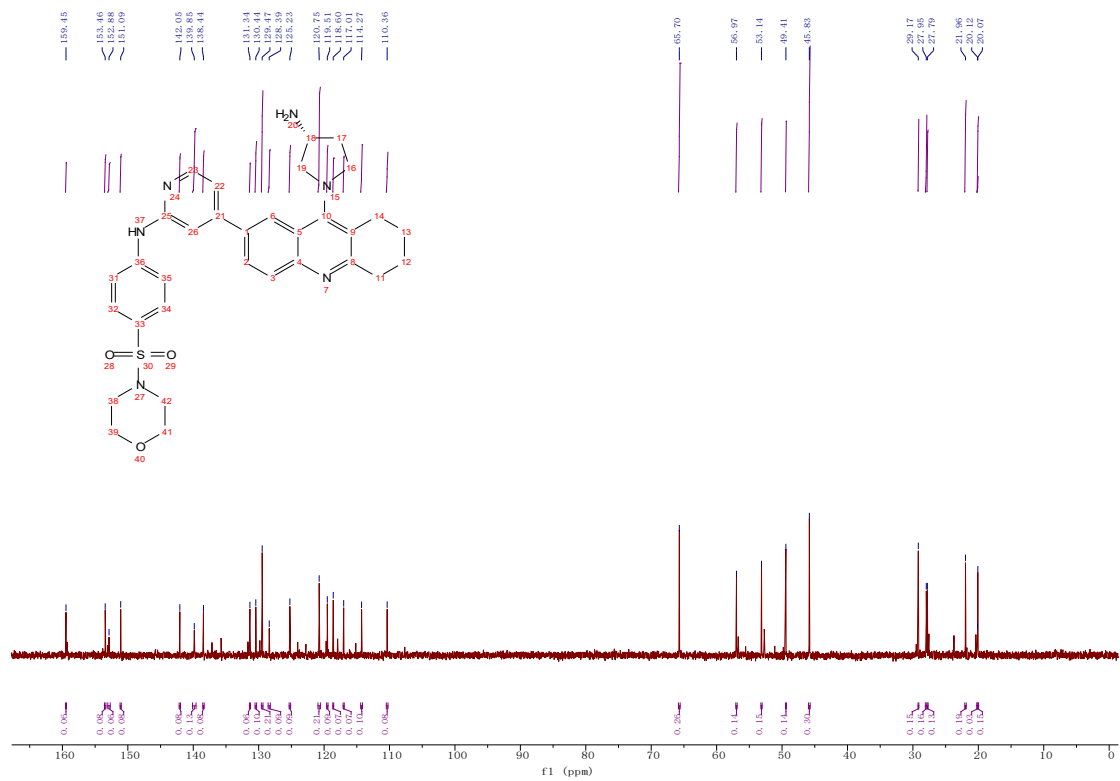

**<sup>13</sup>C NMR spectrum of ZLHT-19 in Deuterium Oxide.**

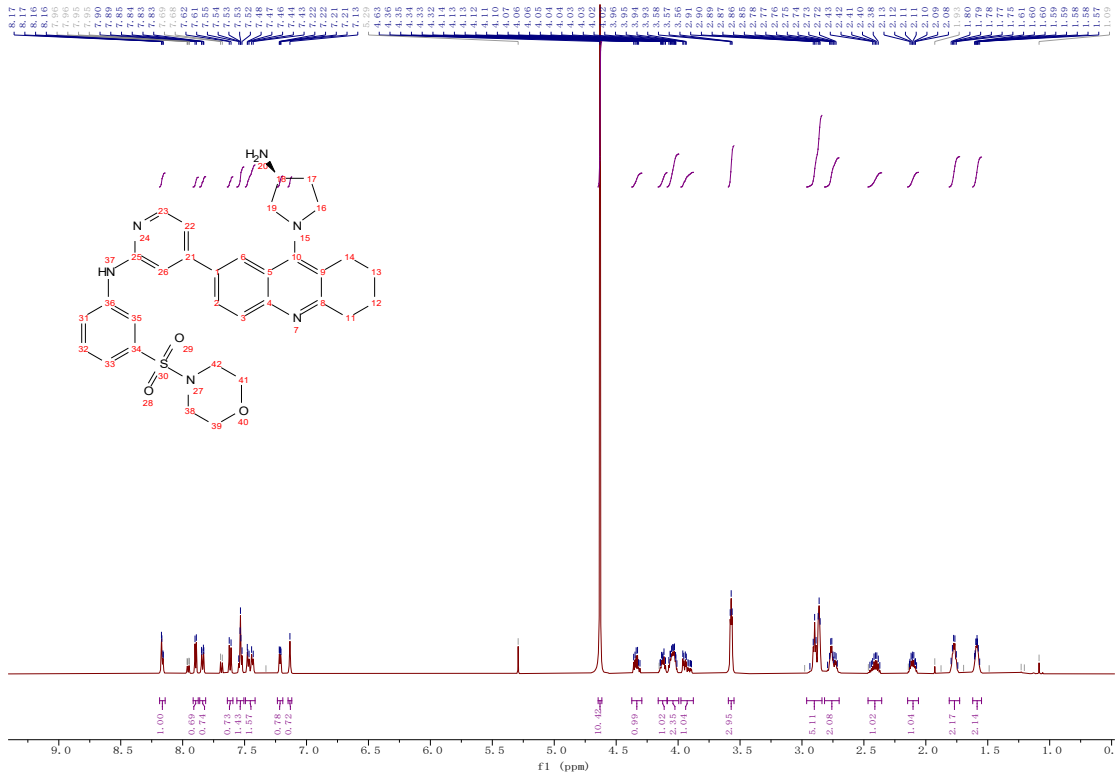

$^1\text{H}$  NMR spectrum of ZLHT-20 in Deuterium Oxide.

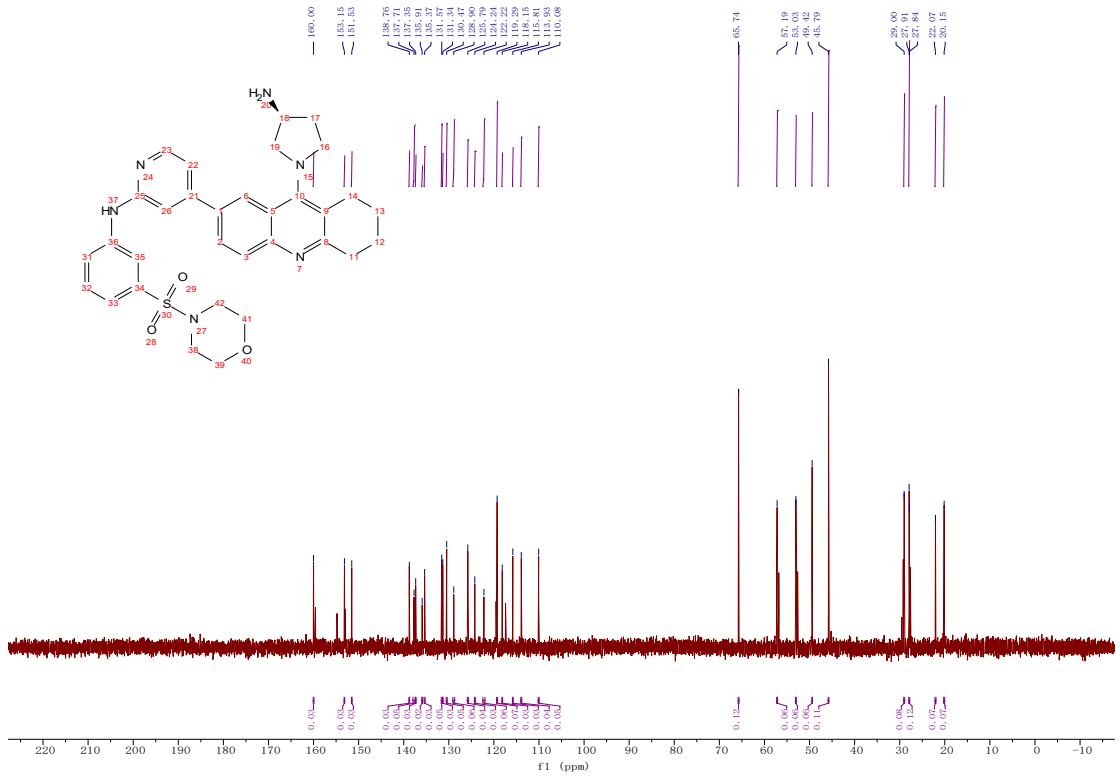

$^{13}\text{C}$  NMR spectrum of ZLHT-20 in Deuterium Oxide.

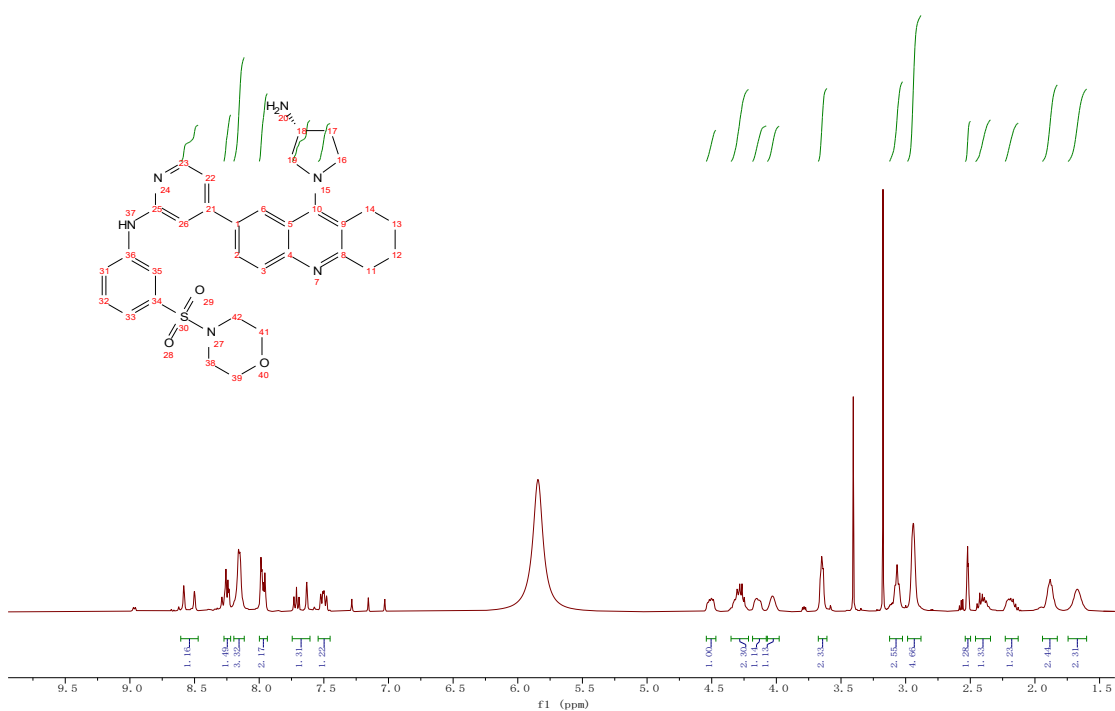

<sup>1</sup>H NMR spectrum of ZLHT-21 in DMSO-*d*<sub>6</sub>.

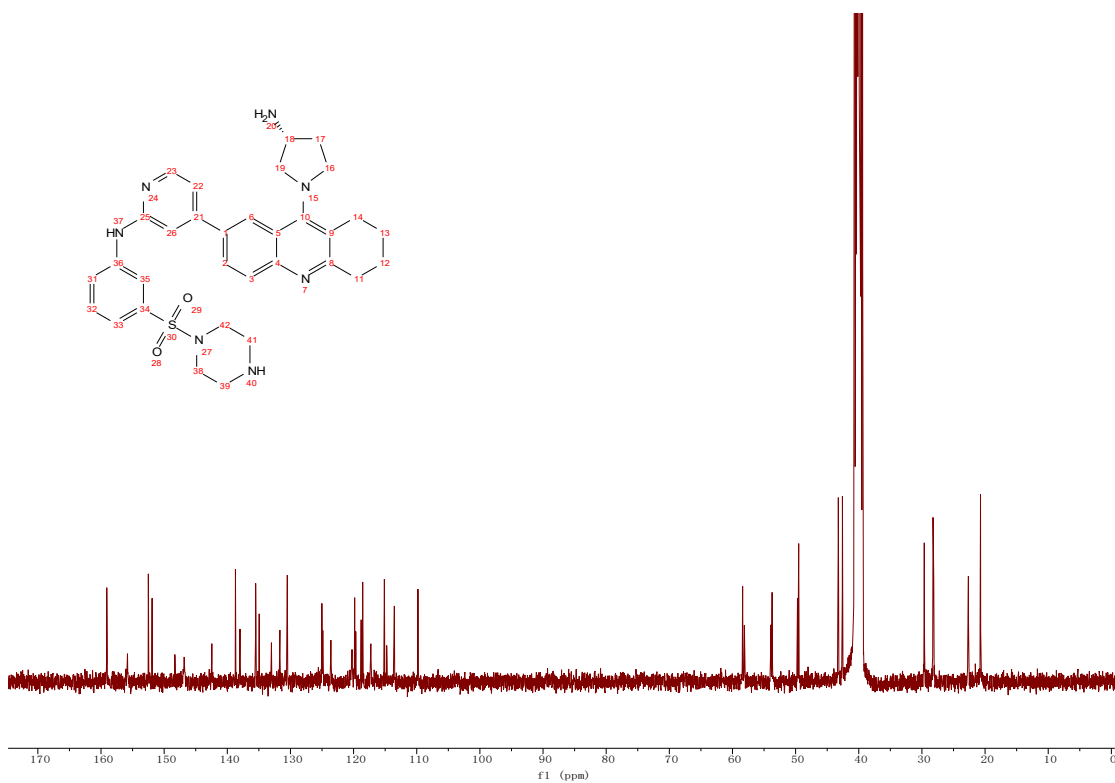

<sup>13</sup>C NMR spectrum of ZLHT-21 in DMSO-*d*<sub>6</sub>.
